1 **ISG15 induces IL-10 production in human monocytes and is a biomarker of**  
2 **disease severity during active tuberculosis**

3 Paula Fernandes dos Santos<sup>\*</sup>, Johan Van Weyenbergh<sup>¶</sup>, Murilo Delgobo<sup>\*</sup>, Daniel de  
4 Oliveira Patricio<sup>\*</sup>, Brian J. Ferguson<sup>§</sup>, Rodrigo Guabiraba<sup>#</sup>, Tim Dierckx<sup>¶</sup>, Soraya  
5 Maria Menezes<sup>¶</sup>, André Báfica<sup>\*★</sup> and Daniel Santos Mansur<sup>\*★1</sup>

6

7 <sup>\*</sup>Laboratory of Immunobiology, Department of Microbiology, Immunology and  
8 Parasitology, Universidade Federal de Santa Catarina, Campus Trindade, Centro de  
9 Ciências Biológicas, Bloco A, sala 213, Santa Catarina, Brasil. CEP 88040-900

10 <sup>§</sup>Department of Pathology, University of Cambridge

11 <sup>#</sup>ISP, INRA, Université François Rabelais de Tours, 37380 Nouzilly, France

12 <sup>¶</sup>Department of Microbiology and Immunology, Rega Institute for Medical Research,  
13 Laboratory for Clinical and Epidemiological Virology, KU Leuven - University of  
14 Leuven, Leuven, Belgium

15 <sup>1</sup>Lead Contact

16 <sup>\*</sup>Correspondence:

17 [daniel.mansur@ufsc.br](mailto:daniel.mansur@ufsc.br) (D.S.M)

18 [andre.bafica@ufsc.br](mailto:andre.bafica@ufsc.br) (A.B.)

19 **Running title**

20 ISG15 drives a monocyte/IL-10 axis disrupted in TB

21

22 **Abstract**

23 Interferon stimulated gene 15 (ISG15) deficiency in humans leads to severe  
24 interferonopathies and mycobacterial disease, the latter being previously attributed to  
25 its extracellular cytokine-like activity. Here, we demonstrate a novel role for secreted  
26 ISG15 as an IL-10 inducer, unique to primary human monocytes. Employing *ex vivo*  
27 systems analysis of human transcriptome datasets, we observed a significant  
28 correlation of ISG15-induced monocyte IL-10 and lymphocyte IFN $\gamma$  expression. This  
29 effect was associated with p38 MAPK and PI3K signalling in healthy volunteers. The  
30 specificity and MAPK/PI3K-dependence of ISG15-induced monocyte IL-10  
31 production was confirmed *in vitro* using CRISPR/Cas9 knockout and  
32 pharmacological inhibitors. Moreover, this *ISG15/IL10* axis was amplified in leprosy  
33 but disrupted in human active tuberculosis (TB) patients. Importantly, ISG15 strongly  
34 correlated with inflammation and disease severity during active TB. In conclusion,  
35 this study identifies a novel anti-inflammatory ISG15/IL-10 myeloid axis that is  
36 disrupted in active TB, revealing a potential biomarker for disease severity in this  
37 major human disease.

38

39

## 40 **Introduction**

41 Type one interferons (IFN-I) exert most of their functions by inducing the expression  
42 of interferon-stimulated genes (ISGs). To date, over 300 ISGs have been described  
43 (de Veer et al., 2001; Der et al., 1998) and interferon stimulated gene of 15 KDa  
44 (ISG15) is prominently expressed in response to infection, in autoimmune diseases,  
45 cancer and physiological processes such as pregnancy (Dos Santos and Mansur, 2017;  
46 Hansen and Pru, 2014; Henkes et al., 2015; Hermann and Bogunovic, 2017; Tecalco  
47 Cruz and Mejia-Barreto, 2017; Wang et al., 2017a). ISG15 is synthesized as a 17 KDa  
48 precursor that is cleaved in the C-terminal region producing a mature form of 15 KDa.  
49 Also called ubiquitin cross-reactive protein (UCRP), ISG15 was the first ubiquitin-  
50 like protein to be described and it can be covalently linked to other proteins in a  
51 process called ISGylation (Dos Santos and Mansur, 2017; Haas et al., 1987; Loeb and  
52 Haas, 1992; Skaug and Chen, 2010). ISGylation is important for cell intrinsic  
53 immunity against several viruses including Influenza A, Vaccinia, Ebola, HIV and  
54 Hepatitis C virus (Morales and Lenschow, 2013; Schoggins and Rice, 2011; Skaug  
55 and Chen, 2010).

56 In addition to its intracellular ISGylation-mediated processes, the mature form of  
57 ISG15 can be secreted and possesses cytokine-like activities that modulate leukocyte  
58 functions (Bogunovic et al., 2013; Dos Santos and Mansur, 2017). For instance,  
59 soluble ISG15 was found to enhance production of IFN $\gamma$  by lymphocytes and NK  
60 cells (Bogunovic et al., 2012; D'Cunha et al., 1996) and to stimulate NK cell  
61 proliferation (D'Cunha et al., 1996) as well as neutrophil migration (Owhashi et al.,  
62 2003). Importantly, ISG15 deficiency in humans is associated with a severe  
63 Mendelian susceptibility to mycobacterial disease (Bogunovic et al., 2012) and cells  
64 from patients with a nonsense mutation or a frame-shift in *isg15* are deficient in IFN $\gamma$ -

65 mediated immunity. This activity is attributed to the effects of extracellular ISG15 in  
66 NK cells and possibly occurs through an unknown receptor (Bogunovic et al., 2012).  
67 Furthermore, humans lacking ISG15 also develop exacerbated IFN-I-induced  
68 immunopathology (Zhang et al., 2015). This evidence suggests that extracellular or  
69 free ISG15, especially in humans (Speer et al., 2016), may regulate multiple aspects  
70 of the host immune response to pathogens and implicates this protein as an important  
71 component induced during infection and inflammatory processes involving IFN-I  
72 signalling. However, despite its ability to induce pro-inflammatory mediators, IFN-I  
73 may also exert anti-inflammatory effects (Billiau, 2006; Borden et al., 2007; McNab  
74 et al., 2015), and whether soluble extracellular ISG15 modulates anti-inflammatory  
75 responses has not been reported.

76 The present study demonstrates that ISG15 induces IL-10 synthesis in human primary  
77 monocytes through MAPK- and PI3K-dependent pathways. Additionally, analysis of  
78 human transcriptome data sets identified a myeloid *ISG15/IL10* axis present in  
79 homeostasis. In contrast, the *ISG15/IL10* axis is disrupted during active TB and  
80 *ISG15* mRNA levels strongly correlate with inflammatory and disease severity  
81 markers. These data suggest ISG15 may play a role in the crosstalk between Type  
82 I/Type II IFNs and IL-10 and reveal *ISG15* mRNA levels as potentially useful  
83 biomarker in human active TB.

84

## 85 **Results and Discussion**

### 86 *ISG15 induces IL-10 production in human PBMC*

87 Extracellular ISG15 stimulates IFN $\gamma$  production by human NK cells (Bogunovic et  
88 al., 2012), so to investigate whether ISG15 regulates synthesis of other inflammatory  
89 cytokines, PBMCs were exposed to soluble ISG15 and 24h cell culture supernatants  
90 assayed for several cytokines by cytometric bead array (CBA). Out of this panel, only  
91 IL-10 and IL-6 were induced by ISG15 (Supplementary figure 1A). IL-10 is a key  
92 immune-regulatory cytokine that exerts opposing effects to IFN $\gamma$ , hence this result  
93 was further assessed by treating PBMCs with different concentrations of pro- or  
94 mature ISG15 indicating a concentration-dependent response (Figure 1A). Following  
95 intracellular processing of pro-ISG15, its C-terminal LRLRGG domain is exposed  
96 and the protein becomes mature, a necessary requirement for ISGylation (Knight et  
97 al., 1988; Loeb and Haas, 1992; Narasimhan et al., 1996; Potter et al., 1999). Both  
98 pro- and mature ISG15 induced IL-10 secretion in human PBMCs in a similar manner  
99 (Figure 1A), indicating that LRLRGG sequence does not need to be exposed for  
100 ISG15-mediated IL-10 production. Exogenous ISG15 stimulated IL-10 synthesis by  
101 PBMCs from most of the healthy donors tested (Figure 1B). Control experiments  
102 showed that heat denatured ISG15 did not promote IL-10 synthesis demonstrating this  
103 protein requires its correctly folded structure to induce cell signalling (Figure 1B).  
104 Kinetic analysis of ISG15-stimulation in human PBMCs showed a peak of IL-10  
105 mRNA and protein synthesis after 6 and 12 hours respectively (Figure 1C and D).  
106 Interestingly, this response was found to be specific for primary cells as a library of  
107 human cell lines (NKL, NK92, THP-1, Karpas, U937 and Jurkat) treated with ISG15  
108 did not produce IL-10 (data not shown). Additionally, ISG15 treatment did not induce  
109 cell death by means of annexin V expression and propidium iodide (PI) incorporation

110 (Figure 1E-G) suggesting IL-10 was actively secreted, not released from nor induced  
111 by apoptotic or necrotic cells. Together, these data show that ISG15 induces IL-10  
112 synthesis and secretion by primary human PBMCs, independent of cell death.

113

114 *CD14<sup>+</sup> cells are the main producers of ISG15-induced IL-10*

115 ISG15 can act on different cell types (Bogunovic et al., 2012; D'Cunha et al., 1996;  
116 Owhashi et al., 2003; Recht et al., 1991) hence intracellular cytokine staining was  
117 used to identify the source of ISG15-induced IL-10 in PBMCs subpopulations. These  
118 experiments indicated that CD14<sup>+</sup> cells are the main source of IL-10 (Figure 2A)  
119 with an average 2.5 fold-increase of CD14<sup>+</sup>IL-10<sup>+</sup> cells as compared to unstimulated  
120 cultures (Figure 2B). Next, PBMCs were separated into CD14<sup>+</sup> and CD14<sup>-</sup>  
121 populations and both groups were exposed to soluble ISG15. Quantification of IL-10  
122 and IFN $\gamma$  24 hours post stimulation confirmed the CD14<sup>+</sup> population to be the main  
123 producers of IL-10 (Figure 2C) whilst we corroborated previous work showing the  
124 CD14<sup>-</sup> population to be the source of ISG15-induced IFN $\gamma$  (Figure 2D) (Bogunovic et  
125 al., 2012; D'Cunha et al., 1996). Additionally, these data indicate that recombinant  
126 ISG15-induced IL-10 synthesis by CD14<sup>+</sup> populations does not require the presence  
127 of CD14<sup>-</sup> cells.

128 To test whether endogenously produced ISG15 stimulates IL-10 synthesis, a co-  
129 culture experiment was set up using a lung epithelial cell line, A549, as a source of  
130 ISG15 (Wang et al., 2017b). For these assays, an *ISG15*-knockout (KO) A549 cell  
131 line was generated using CRISPR/Cas9 technology (Supplementary Figure 1B, clone  
132 3). Wild type (WT) or *ISG15*-KO A549 cells were then co-cultured with purified  
133 human primary CD14<sup>+</sup> cells or stimulated with LPS as a positive control. In this  
134 setup, A549-monocyte co-cultures led to a consistent production of IL-10, an outcome

135 completely abrogated when *ISG15*-KO A549 cells were used. This effect could be  
136 rescued by re-introduction of the *ISG15* gene into the knockout cells (Figure 2E) thus  
137 demonstrating the specificity of epithelial cell-derived ISG15 for the induction IL-10.  
138 To study co-regulation of *ISG15/IL10/IFNG* pathways in different cell types *ex vivo*,  
139 we next examined transcriptome datasets of purified major human leukocyte subsets  
140 (ImmuCo, ImmuSort) (Wang et al., 2015a; Wang et al., 2015b). Expression levels of  
141 *ISG15* and *IL10* are positively correlated in total PBMCs, purified monocytes and  
142 macrophages, but not neutrophils and T-cells (Figures 2F-J). Although neutrophils  
143 display the highest *ISG15/IL10* expression ratio, monocytes are the main *ex vivo* *IL10*  
144 expressing cell type (60.19% of cells with *IL10* transcripts above detection limit, vs.  
145 17.33% in PBMCs and 5.97% in neutrophils, Fig. 2K), thus corroborating with our *in*  
146 *vitro* results (Fig. 2A-D). Consistent with a previous study (Tamassia et al., 2013),  
147 low or undetectable *IL10* transcripts in human neutrophils (Fig. 2K) are explained by  
148 the inactive chromatin configuration of the *IL10* locus in these cells. Together, this set  
149 of results suggests a role for extracellular rather than intracellular ISG15 as inducer of  
150 monocyte-derived IL-10 (this study) and NK-derived IFN $\gamma$  (Bogunovic et al., 2012).  
151 Since the unique susceptibility of ISG15-deficient children to low virulence  
152 mycobacteria has underscored a role for extracellular ISG15 (Bogunovic et al., 2012),  
153 we performed a systems analysis approach to gain insights on the possible influence  
154 of ISG15/IL-10 axis during mycobacterial exposure in humans.

155

156

157 *IL-10 production in response to ISG15 requires MAPK-PI3K signalling pathways*  
158 Mitogen-activated protein kinase (MAPK) and phosphatidylinositol-4,5-bisphosphate  
159 3-kinase (PI3K) signalling pathways have been shown to participate in *IL10*  
160 transcription in human monocytes and macrophages. For instance, p38, ERK1/2 and  
161 PI3K are crucial for IL-10 synthesis during microbial stimuli such as LPS and  
162 *Mycobacterium* (Ma et al., 2001; Nair et al., 2009). Thus, we analysed a published  
163 transcriptome dataset of latent TB using WebGEstalt and Ingenuity Pathway Analysis  
164 (IPA). As shown in Supplementary Table, MAPK and PI3K signalling pathways were  
165 significantly enriched in latent TB transcriptomes, as compared to healthy, uninfected  
166 controls. We next investigated whether members of MAPK and PI3K signalling  
167 families displayed divergent expression patterns between latent and active TB. MAPK  
168 family members were up-regulated in both latent and active TB (Figure 3A).  
169 However, *PIK3CA* (PI3Kalpha) levels were up-regulated in active TB and down-  
170 regulated in latent TB. In this scenario *MAPK14* (p38) expression levels were  
171 significantly and positively correlated to *ISG15* levels *ex vivo* (Figure 3B).  
172 Additionally, *MAPK3* (MAP3K/ERK1) levels were positively correlated to *IL10*  
173 (Figure 3C) and negatively correlated to *IFNG* transcript levels (Figure 3D). Finally,  
174 *PIK3CA* and *PIK3CB* (PI3Kbeta) transcripts were negatively correlated to *IL10*  
175 expression levels (Figure 3E). These data suggested that ISG15/IL-10 as well as  
176 MAPK/PI3K-associated transcripts are co-regulated during mycobacterial stimulation  
177 *in vivo* and raised the possibility that MAPK/PI3K pathway is involved in ISG15-  
178 induced IL-10 responses in monocytes. Indeed, following exposure of CD14<sup>+</sup> cells to  
179 ISG15, increased phosphorylation of p38 MAPK was observed (Figure 3F). More  
180 importantly, the use of two distinct inhibitors for p38 (Figures 3G-H) as well as  
181 inhibitors for MEK1/2 (Figure 3I) and PI3K (Figure 3J) abrogated IL-10 production



182 in ISG15-stimulated monocytes. In contrast, chloroquine, an inhibitor targeting DNA-  
183 PKCs/TLR9/endosome signalling pathways, did not affect IL-10 synthesis induced by  
184 ISG15 (Figure 3J). These results suggest a central role for p38 activation and MAPK  
185 as well as PI3K signalling in ISG15-induced IL-10 production by primary monocytes.

186

### 187 *An ISG15/IL10/IFNG cluster in healthy controls is disrupted during active TB*

188 Altogether, our data indicated that ISG15 is associated with immunoregulatory  
189 responses and it could have an important role in mycobacterial-induced inflammation.

190 To test this concept, publicly available transcriptome data sets from established  
191 cohorts of healthy controls and patients with leprosy as well as latent or active  
192 tuberculosis were examined. Positive and negative correlations (Spearman Rho) were  
193 calculated between normalized transcript levels of MAPK/PI3K/STAT signalling  
194 family members, established myeloid lineage markers (*CD14*,  
195 *CD16=FCGR3A/FCGR3B*, *ITGAM*, *ITGAX*) and lymphoid lineage markers (*CD4*,  
196 *CD8*, *CD56=NCAM1*, *ITGAL*) plus *ISG15*, *IL10* and *IFNG* transcripts. Unsupervised  
197 hierarchical clustering of these transcripts was then performed, based on the resulting  
198 correlation matrices. In healthy controls (Figure 4A), *ISG15* mRNA strongly clusters  
199 with *IL10*, and to a lesser extent with *IFNG*, indicating the existence of a regulatory  
200 balance between pro-and anti-inflammatory effects under homeostatic conditions.

201 Leprosy lesions have been shown to express both type I IFN and IL-10, a scenario  
202 that leads to suppression of IFN $\gamma$  effector activities (Teles et al., 2013). An  
203 unsupervised hierarchical cluster analysis of the cohort published by Teles and  
204 colleagues shows the myeloid anti-inflammatory *ISG15/IL10* axis maintained in  
205 leprosy lesions (Figure 4B), demonstrated by a single expression cluster comprised of,  
206 *ISG15*, *IL10* and monocyte (*CD14*) and myeloid markers (*CD64=FCGR1*,

207 CD11c=*ITGAX*, PU.1=*SPI1*, CD16=*FCGR3*). Consistent with previous data (Teles et  
208 al., 2013), this disease cluster was negatively correlated to a “protective”  
209 *CD8/IFNG/STAT4* cluster, which is associated with milder (borderline  
210 tuberculoid/paucibacillary) clinical form, whereas the *ISG15/IL10/CD14* cluster was  
211 associated with the severe (lepromatous/multibacillary) disease form. Surprisingly,  
212 the *ISG15/IL10* axis was disrupted in whole blood transcriptomes of active TB  
213 (Figure 4C). However, ISG15 (but not *IL10* or *IFNG*) retained its association with  
214 disease status and monocyte/myeloid markers (*CD14*, *FCGR1*). Since TB disease  
215 signature in the whole blood is predominated by neutrophils (Berry et al., 2010) and  
216 monocytes only make up a minor fraction in these samples, we next investigated  
217 whether components of the *ISG15/IL10* signalling pathway might be overexpressed in  
218 purified monocytes from TB patients, as compared to control monocytes. Indeed,  
219 Ingenuity Pathway Analysis identified MAPK signalling as significantly enriched in  
220 monocytes from TB patients (Supplementary Table), and p38 MAPK was  
221 significantly interconnected with several TB signature genes (*FCGR1*, *IL27*,  
222 *SIGLEC6*) in a disease network (Figure 4D). Together, these results show the  
223 *ISG15/IL10* axis is disrupted during active TB.

224 To further investigate the possible connection between ISG15 and *M. tuberculosis*-  
225 mediated immunopathology, we examined the expression of this gene in an  
226 independent large cohort in which both detailed clinical parameters and  
227 corresponding transcriptome data are available (Berry et al., 2010). Expression levels  
228 of *ISG15* were significantly correlated with established inflammatory biomarkers such  
229 as erythrocyte sedimentation rate (ESR), C-reactive protein (CRP), tissue damage  
230 (Modal X-ray grade) as well as systemic clinical parameters (neutrophil count,

231 haemoglobin, and globulin serum concentration) (Figure 4 G-L). These results  
232 suggest ISG15 may be a biomarker of disease severity in active TB patients.  
233 Currently, there are no reports on the expression of ISG15 during human  
234 mycobacterial diseases *in vivo*. In the bioinformatics approach performed here, some  
235 but not all cohorts showed differences in ISG15 mRNA expression between healthy  
236 volunteers (HV) and acute TB patients (data not shown). However, since HV  
237 displayed high levels of ISG15 expression, it would be important to obtain parametric  
238 data from pre vs post-infection patients' samples. While ISG15 is critical for IFN $\gamma$   
239 production by cells from vaccine strain *BCG*-infected patients (Bogunovic et al.,  
240 2012), this protein has a synergistic effect when combined with IL-12 (Bogunovic et  
241 al., 2012), an important inducer of IFN $\gamma$  (Chan et al., 1992; Chan et al., 1991).  
242 Furthermore, IL-10 inhibits production of IL-12 and, consequently, of IFN $\gamma$  by  
243 PBMCs (D'Andrea et al., 1993), pointing to a pleiotropic effect for ISG15. Cell type  
244 and context dependent effects of ISG15 could explain these diverse activities. This  
245 work and others (Bogunovic et al., 2012) suggest that despite ubiquitous expression in  
246 different cell types, neutrophils are a major source of secreted ISG15. Additionally,  
247 *Mtb*-infected macrophages can release microparticles containing ISG15 *in vitro* (Hare  
248 et al., 2015). Although we have not tested this directly, we speculate that soluble  
249 phagocyte-derived ISG15 is important to the orchestration of immune responses *in*  
250 *vivo*, driving the production of at least two major cytokines, IL-10 and IFN $\gamma$   
251 (Supplementary Figure 2). Interestingly, the intra and extracellular location of ISG15  
252 and its ability to induce a plethora of effects in distinct cells, resembles the function of  
253 an alarmin (Rider et al., 2017). As shown in figure 4, ISG15's function is context  
254 dependent, varying from a driver of an anti-inflammatory monocytic/IL-10 axis in  
255 homeostasis and the less severe *M. leprae* infection to a strong pro-inflammatory

256 IFN $\gamma$ -biased scenario during active TB. Additionally, since ISG15 and IL-10 lack  
257 correlation in active *M. tuberculosis* infection, it is possible that IL-10 is controlled by  
258 different signals other than ISG15 during disease. Whether virulent *M. tuberculosis*  
259 hijacks the ISG15/IL-10 axis contributing to induction of tissue pathology remains to  
260 be determined.

261 In conclusion, these findings confirm and extend previous work characterizing soluble  
262 extracellular ISG15 as a pleiotropic cytokine (or alarmin) that induces both pro- and  
263 anti-inflammatory effects in a variety of cell types. Moreover, the combined *ex vivo*  
264 and *in vitro* approach uncovers a novel myeloid *ISG15/IL10* p38-mediated anti-  
265 inflammatory signalling cascade, which is preserved in human leprosy but disrupted  
266 in active TB. Strikingly, our data indicate *ISG15* mRNA as a novel biomarker of  
267 disease severity during acute TB that merits further investigation.

268

269 **Figure Legends**

270 **FIGURE 1** – ISG15 induces the production of IL-10 in human PBMCs. (A) Dose-  
271 dependent IL-10 production as measured by ELISA 24 hours post stimulation of  
272 PBMCs with both pro- and mature ISG15 ([ISG15]: 0.15; 0.45; 1.5, 4.5 and 15  
273  $\mu\text{g}/\text{mL}$ ). (B) Induction of IL-10 by recombinant, but not heat-treated, ISG15 using  
274 PBMCs from a total of 5 different donors in 8 independent experiments. (C) *IL10*  
275 mRNA expression in PBMCs treated with ISG15 at 6, 12, 24 and 48 hours post  
276 stimulation. (D) Quantification of IL-10 in the supernatant of human PBMCs at 6, 12,  
277 24 and 48 hours after treatment with of ISG15 (E) Representative dot-plot evaluating  
278 cell-death in human PBMCs by annexin V and PI staining after treatment with ISG15  
279 ( $2.0 \mu\text{g}/\text{m}$ ) or Staurosporine ( $1 \mu\text{M}$ ). (F, G) Quantification of cell death from the  
280 experiment described in (E). Unless stated otherwise, ISG15 concentration was  $1.5$   
281  $\mu\text{g}/\text{mL}$ . Error bars indicate SEM for biological replicates in each experiment. In each  
282 experiment PBMCs from 3 or more different donors were used. \* P-value<0.05, \*\* p-  
283 value<0.01 and \*\*\*\* p-value<0.0001. ISG15HT, ISG15 heat-treated; STA,  
284 Staurosporine; PI, Propidium Iodide; Uns, Unstimulated.

285

286 **FIGURE 2** – CD14<sup>+</sup> cells are the main source of IL-10 upon ISG15 stimulation. (A)  
287 Representative dot plot of intracellular staining of IL-10 in CD14<sup>+</sup>, CD56<sup>+</sup>, CD4<sup>+</sup> and  
288 CD8<sup>+</sup> in ISG15-treated PBMCs. (B) PBMCs from 6 different individuals showing  
289 fold increase in IL-10 production from CD14<sup>+</sup>, CD56<sup>+</sup>, CD4<sup>+</sup> and CD8<sup>+</sup> populations  
290 after ISG15 stimulation. (C-D) ELISA quantification of IL-10 and IFN $\gamma$  in the  
291 supernatants of CD14<sup>+</sup> and CD14<sup>-</sup> separated populations treated with ISG15 (E)  
292 A549 WT or ISG15 KO cells were co-cultured with primary CD14<sup>+</sup> cells  
293 magnetically separated from PBMCs and IL-10 production was measured by ELISA

294 24 hours later. *ISG15* KO cells were also transfected with a plasmid expressing *ISG15*  
295 in order to rescue its function. LPS was used as a positive control for IL-10  
296 stimulation. Error bars indicate SEM for biological replicates in each experiment. All  
297 experiments were repeated at least two times. In every experiment PBMCs from 3 or  
298 more donors were used. (F-J) Transcriptome datasets of healthy controls (ImmuCo,  
299 ImmuSort) confirm *ISG15* and *IL10* *ex vivo* expression levels are strongly and  
300 positively correlated in total PBMCs (F), purified primary monocytes (G) and  
301 macrophages (H), but not neutrophils (I) or T cells (J). Red lines indicate the  
302 approximate threshold for *IL10* mRNA detection (determined for each individual  
303 microarray). (K) Neutrophils display the largest *ISG15/IL10* ratio *ex vivo*, whereas  
304 monocytes are the major *IL10* expressing leukocyte population  
305 (>PBMCs>neutrophils) under homeostatic conditions. \*\*\*\* p-value<0.0001.

306

307 **FIGURE 3:** ISG15 induces monocyte derived IL-10 via p38, MEK1/2 and PI3K  
308 signalling pathways, which are deregulated in human mycobacterial infections. (A)  
309 MAPK family members expression in both latent and active TB. *Ex vivo* expression  
310 levels correlation of *MAPK14* and *ISG15* (B), *MAPK3* and *IL-10* (C), *MAPK3* and  
311 *IFNG* (D) and of *PIK3CA* or *PIK3CB* with *IL-10* (E) during latent TB infection (F)  
312 Representative immunoblot showing the phosphorylation of p38 MAPK 15 min after  
313 the stimulation of ISG15 in CD14<sup>+</sup> cells. (G-J) CD14<sup>+</sup> cells were treated for 1h with  
314 p38 (10 μM), MEK1/2 (50 μM) and PI3K inhibitors (50 μM) (B-E respectively) prior  
315 to addition of ISG15 (1μg/mL) or LPS (100 ng/mL). (K) Chloroquine (5μg/mL) was  
316 used as an unrelated control drug. 24 hours after treatment, supernatant was harvested  
317 and used for IL-10 quantification by ELISA. Error bars indicate SEM for biological

318 replicates in two independent experiments. \* P-value<0.05, \*\* p-value<0.01 and \*\*\*  
319 p-value<0.001. Uns, Unstimulated.

320

321 **FIGURE 4:** An anti-inflammatory *ISG15/IL10* myeloid axis is amplified in human  
322 leprosy and disrupted in human tuberculosis, revealing a novel clinical biomarker. (A-  
323 C) Heatmaps representing positive (red) and negative (blue) correlation matrix of  
324 selected genes (see text) classified by unsupervised hierarchical clustering (Euclidean  
325 distance). (A) Healthy controls (GSE80008) (B) Leprosy patients (GSE82160) (C)  
326 TB cohort (GSE85487) (D) Significantly enriched network (Ingenuity Pathway  
327 Analysis) showing p38 MAPK as highly interconnected in the monocyte  
328 transcriptome of TB patients. (E-F) *ISG15* transcript correlates with (G, H)  
329 established inflammatory metrics (erythrocyte sedimentation rate (ESR), C-reactive  
330 protein (CRP), (I) tissue damage (Modal X-ray grade) as well as (J-L) systemic  
331 clinical parameters (neutrophil count, haemoglobin, and globulin serum  
332 concentration).

333

#### 334 **Supplemental figure 1**

335 (A) ISG15 induces the production inflammatory cytokines. PBMCs from healthy  
336 donors were treated with ISG15 (15 µg/mL) and supernatant was harvested 24 hours  
337 for inflammatory cytokines quantification by cytometric Bead Array (CBA). ISG15  
338 induced the production of IL-10, IL-6 and IL-1β. (B) Generation of ISG15 deficient  
339 A549 cell line. ISG15 deficient A549 cell line was produced using CRISPR/Cas9.  
340 After clone selection, cells were stimulated with IFNβ (1000 IU/mL), proteins  
341 extracted after 24 hours and immunoblotted with anti-ISG15 and anti-tubulin  
342 antibodies. Clone 3 (ISG15 KO) was used for further experiments.

343 **Supplemental figure 2**

344 Proposed model. ISG15 induces both IL-10 (Blue) and IFN $\gamma$  (Red) biased responses  
345 in humans. The ISG15/IL-10 myeloid axis is present healthy individuals and also in  
346 leprosy lesions while ISG15/IFN $\gamma$  lymphoid axis is characteristic of anti-Mtb  
347 immunity but is also related to immunopathology, a state in which ISG15 transcripts  
348 strongly correlates with disease severity parameters when the myeloid axis is  
349 disrupted. Dotted lines represent known literature (Chomarat et al., 1993; Redford et  
350 al., 2011).

351 **Supplemental Table**

352 Tab 1. PI3K gene expression enriched during latent tuberculosis.

353 Tab 2. MAPK gene expression enriched during latent tuberculosis.

354 Tab 3. Ingenuity Pathway Analysis for MAPK in monocytes during latent  
355 tuberculosis.

356 Tab 4. p38 network in monocytes during active tuberculosis.

357

358 **Material and methods**

359 *Reagents*

360 ISG15 was purchased from Boston Biochem and tested for endotoxins by R&D  
361 Systems (endotoxin value for lot #DBHF0614021 is <0.00394 EU/ $\mu$ g). LAL assay  
362 (Lonza) was performed according to the manufacturer's instruction and the endotoxin  
363 level of recombinant ISG15 was below the detection threshold. Pro-ISG15 (UL-615)  
364 was also purchased from Boston Biochem. *E. coli* LPS (strain O111:B4) (Invivogen)  
365 was used as a positive control for IL-10 production in human PBMCs and monocytes.  
366 P38 kinase inhibitors SB203580 and SB220025 (Calbiochem) were used at 10  $\mu$ M,  
367 MEK1/2 inhibitor U0126 (Cell Signaling) at 50  $\mu$ M and PI3K inhibitor Ly294002



368 (Cell Signaling) was at 50  $\mu$ M. Solvent (DMSO, medium) was used as negative  
369 control and chloroquine (Sigma, 5 $\mu$ g/mL), a DNA-PKC/TLR endosomal signalling  
370 inhibitor, was used as an additional negative control.

371

### 372 *Primary human cells*

373 Human PBMCs were separated from healthy individuals using Ficoll-paque (GE)  
374 according to manufacturer's instructions. Briefly, blood was collected in heparin-  
375 containing tubes, and gently mixed 1:1 with saline solution and gently mixed before  
376 being added over one volume of Ficoll-paque reagent. The gradient was centrifuged  
377 for 35 minutes at 400 x g, 18°C. PBMCs were harvested and washed once with 45 mL  
378 of saline solution for 10 min at 400 x g, 18°C. Subsequently, cell pellet was  
379 suspended and washed twice with 5 mL of saline solution for 10 min at 200 x g, 18°C  
380 to remove platelets. The remaining cell pellet was suspended to the desired density in  
381 RPMI 1640 (Gibco) supplemented with 5% foetal calf serum (Hyclone), 2mM L-  
382 glutamine (Gibco), 1 mM sodium pyruvate (Gibco), 25 mM HEPES (Gibco), 100  
383 U/mL penicillin and 100  $\mu$ g/mL streptomycin (Gibco). Cells were plated as described  
384 in each experiment. Human primary monocytes (CD14<sup>+</sup> cells) were separated from  
385 PBMCs using CD14 microbeads (Miltenyi Biotec) according to manufacturer's  
386 instructions with the exception of the MACS buffer, which was prepared using 3%  
387 foetal calf serum. Monocyte enrichment varied between 73 to 92% between  
388 experiments. The use of PBMCs from healthy donors was previously approved by  
389 UFSC ethical committee (IRB#283/08).

390

### 391 *Generation of isg15 knockout cell lines*

392 A549 lung epithelial cells were co-transfected with three gRNA/Cas9/GFP plasmids  
393 (provided by Horizon) targeting the *ISG15* locus using JetPEI (PolyPlus  
394 Transfection). The guide RNAs used were 5' GGCTGTGGGCTGTGGGCTGT 3', 5'  
395 GGTAAGGCAGATGTCACAGG 3' and 5' TGGAGCTGCTCAGGGACACC 3'.72  
396 hours after transfection, cells sorted for GFP fluorescence and then separated by  
397 limiting dilution. Single-cell derived clones were selected for ISG15 expression  
398 (Supplementary Figure 1B).

399

#### 400 *A549 – CD14<sup>+</sup> co-culture*

401 A549 WT or ISG15 KO cells were seeded at  $2 \times 10^5$  cells/ml in 24 well-plates. Cells  
402 rested in the incubator for 6 hours before ISG15 KO cells were transfected with  
403 ISG15-pCEP4 plasmid using FugeneHD reagent (Promega) according to  
404 manufacturer's instructions. Cells were then washed and LPS was added 18 hours  
405 after transfection and immediately prior to the addition of a  $2 \times 10^5$  CD14<sup>+</sup> cells  
406 overlay. Following 24 hours of co-culture, supernatants were harvested for IL-10  
407 quantification.

408

#### 409 *Immunoblotting*

410  $1 \times 10^5$  CD14<sup>+</sup> cells were added to a 96-well plate and left to rest overnight. Cells  
411 were stimulated with ISG15 (1µg/ml) and after 15 minutes cells were spun at 4°C,  
412 supernatant was removed and M-PER lysis buffer (Thermo Scientific) containing  
413 protease inhibitors (Complete, Mini Protease Inhibitor Tablets, Roche) and  
414 phosphatase inhibitors (#524625, Calbiochem) was added to the cells. Protein  
415 separation was performed according to M-PER manufacturer's instructions.  
416 Antibodies concentrations for detection of p38 (Cell Signaling #9212) and p-p38 (Cell

417 Signaling #9211), ISG15 (Cat: A600, R&D Systems) and anti- $\alpha$ -Tubulin (clone  
418 DM1A, Millipore) were those suggested by the manufacturers. For Western blots, at  
419 least 20  $\mu$ g of total protein were separated and transferred to a PVDF 0.22  $\mu$ m  
420 blotting membrane. Membrane was blocked for at least 1 hour with 1X Tris Buffered  
421 Saline-0.1% Tween20 (TBST) with 5% w/v non-fat dry milk and subsequently  
422 washed 3 times with TBST for 5 minutes each wash. Membrane was incubated with  
423 primary antibodies diluted in 5% w/v BSA, 1X TBS, 0.1% Tween20 at 4°C with  
424 gentle shaking overnight. Membrane was washed 3 times for 5 min each with TBST  
425 and then incubated with the appropriate secondary HRP-linked antibody for 1 hour at  
426 room temperature. Membrane was washed 3 times of 5 min each with TBST before  
427 detection with ECL chemiluminescent substrate (Pierce).

428

#### 429 *p38 MAPK and PI3K signalling pathway inhibition*

430  $1 \times 10^5$  CD14<sup>+</sup> cells were added to a 96-well plate and left to rest overnight. Inhibitors  
431 were added to cells for 1 hour prior to ISG15 treatment. 24 hours after treatment, cells  
432 were spun at 4°C; supernatant was harvested and IL-10 was quantified by ELISA.

433

#### 434 *Cytokine quantification*

435 For exploratory experiments, IL-1 $\beta$ , IL-6, IL-10, IL-12p70 and TNF were quantified  
436 in supernatants by human inflammatory cytokine cytometric beads array kit (CBA,  
437 BD Biosciences). IL-10 and IFN $\gamma$  were quantified using Human IL-10 DuoSet ELISA  
438 kit (R&D Systems) or Human IFN $\gamma$  mini kit (Thermo Scientific) according to  
439 manufacturer's instructions.

440

#### 441 *Flow Cytometry Assays*

442 PBMCs were seeded at a density of  $5 \times 10^5$  cells per well in 150  $\mu$ L of medium. After  
443 8 hours of resting at 37°C with 5% CO<sub>2</sub>, cells were treated with ISG15 (2  $\mu$ g/mL) or  
444 LPS (1  $\mu$ g/mL), unless indicated otherwise. Golgi Plug protein transport inhibitor  
445 (BD Biosciences) was added 1-hour post treatment, according to manufacturer's  
446 instructions. Then, 12 hours post treatment; growth medium was removed and cold  
447 1X HBSS (Gibco) with 2.5 mM EDTA was added to each well. The tissue culture  
448 dish was kept at 4°C for 30 minutes and cells were suspended and transferred to 1.5  
449 mL tubes. Cells were washed in a final volume of 1mL cold 1X HBSS (Gibco) with  
450 2.5 mM EDTA at 300 x g and 4°C for 5 minutes. Supernatant was removed and cells  
451 were suspended in FACS buffer (1% BSA, 1% sodium azide in 1X PBS). Anti-human  
452 antibody mix containing anti-CD4 APC-Cy7 (clone OKT1) (BioLegend), anti-CD8  
453 PE-Cy7 (clone SK1) (BioLegend), anti-CD14 PerCP-Cy5.5 (clone M5E2)  
454 (BioLegend), anti-CD56 FITC (clone NCAM 16.2) (BD Biosciences) was added to  
455 the cell suspension for 40 min at 4°C in the presence of 10% AB blood-type human  
456 serum to block Fc receptors. Afterwards, cells were washed once with 1 mL of 1X  
457 PBS at 300 x g, 4°C, for 5 minutes and 1 mL of fixation buffer (1% paraformaldehyde  
458 in 1X PBS) was added to the cells. Tubes were kept in the dark at room temperature  
459 for 15 min and then centrifuged at 300 x g, 4°C, for 10 min to remove supernatant. 1  
460 mL of permeabilization buffer (0.5% saponin in FACS buffer) was added to the cells  
461 and tubes were centrifuged at 300 x g, 4 C for 10 min. Intracellular stain with anti-IL-  
462 10-PE (clone JES3-9D7) (BioLegend) was carried out for 30 min in the dark at room  
463 temperature. Cells were washed with permeabilization buffer at 300 x g, 4°C, 5 min,  
464 supernatant was removed and cells were suspended in FACS buffer prior to  
465 acquisition of  $1 \times 10^5$  events or more. For analysis, all acquired events displayed as  
466 forward scatter (FSC) and side scatter (SSC) parameters were selected. After that,

467 single cells events were selected using FSC area and height parameters (FSC-A x  
468 FCS-H) and auto-fluorescence was excluded using APC as an open channel.  
469 Intracellular IL-10 was then quantified in monocytes (CD14<sup>+</sup>IL-10<sup>+</sup>), NK cells  
470 (CD56<sup>+</sup>IL-10<sup>+</sup>), CD4 (CD4<sup>high</sup>IL-10<sup>+</sup>) and CD8 T cells (CD8<sup>high</sup>IL-10<sup>+</sup>). Gates were  
471 set according to unstained PBMC sample and controls. All samples were acquired on  
472 a Becton-Dickinson Verse flow cytometer using BD FACSuite™ software. In order  
473 to analyse cell death, 5x10<sup>5</sup> PBMC/well were treated with ISG15 2 µg/mL or  
474 Staurosporine (Sigma) 1 µM for 24 hours. Cells were then harvest, washed with 1 mL  
475 of PBS at 300 x g, room temperature, 5 min, supernatant was removed and cells were  
476 washed once in 1 mL of 1x Annexin binding buffer (eBioscience). Cell were  
477 resuspended at 10<sup>6</sup> cells/mL in 1x Annexin binding buffer and FITC conjugated  
478 Annexin V (eBioscience) was added to the cell suspension for 15 min, room  
479 temperature, according to manufacture's instruction. Following incubation period,  
480 cells were washed with 1 mL of 1x Annexin binding buffer, 300 x g, room  
481 temperature, 5 min and resuspended in 200 µL of 1x annexin binding buffer. Propidium  
482 iodide (BD Pharmingen) was added at 0.25 µg/mL to the cell suspension prior to  
483 sample acquisition. Samples were acquired on a Becton-Dickinson Canto II flow  
484 cytometer using BD FACSDiva™ software.

485

#### 486 *Real time quantitative PCR (qPCR)*

487 For relative quantification of *IL10* gene expression, total RNA was extracted from  
488 PBMCs treated or not with ISG15. RNA was extracted after 6, 12, 24 or 48 hours of  
489 treatment using RNeasy RNA extraction kit (Qiagen). Using 400 ng of RNA, cDNA  
490 was produced with High-Capacity cDNA Reverse Transcription Kit (Applied  
491 Biosystems) and 2µL of the product was used for the qPCR reaction in a final volume

492 of 10  $\mu$ L. qPCR reactions were performed using the primers forward 5'GAG ATC  
493 TCC GAG ATG CCT TCA G 3'and reverse 5'CAA GGA CTC CTT TAA CAA  
494 CAA GTT GT 3' (Skrzeczynska-Moncznik et al., 2008). Fold-increase in *IL10* gene  
495 expression was determined by relative quantification using hypoxanthine  
496 phosphoribosyltransferase (*HPRT*) as endogenous control. Primers forward and  
497 reverse for *HPRT* were 5' CCTGCTGGATTACATCAAAGCACTG 3' and 5'  
498 TCCAACACTTCGTGGGGTCCT 3', respectively, and were used at 250 nM each.

499

#### 500 *Microarray analysis*

501 Curated and annotated publicly available data-sets (Berry et al., 2010; Novais et al.,  
502 2015; Speake et al., 2015; Teles et al., 2013; Wang et al., 2015a; Wang et al.,  
503 2015b)(GXB, Immuco, Immusort, BioGPS, GEO) were obtained from large,  
504 established cohorts of healthy controls, latent and active tuberculosis patients,  
505 comprising *ex vivo* and *in vitro* whole blood, total PBMCs, purified leukocyte subsets,  
506 non-leukocyte human primary cells and skin biopsies (leprosy patients, healthy  
507 controls and cutaneous leishmaniasis as non-mycobacterial infectious control). Novel  
508 datasets were generated for both whole blood and PBMCs from healthy controls and  
509 individuals infected with other non-mycobacterial intracellular pathogens  
510 (*Leishmania*, HIV-1, HTLV-1). PBMCs were isolated as above and immediately  
511 frozen in Trizol to preserve RNA integrity. Following Trizol extraction, total RNA  
512 was further purified using an RNeasy kit according to the manufacturer's protocol  
513 (QIAGEN, Venlo, Netherlands). Affymetrix Whole Genome microarray analysis was  
514 performed by the VIB Nucleomics Facility (Leuven, Belgium) using a GeneChip<sup>®</sup>  
515 Human Gene 1.0 ST Array with the WT PLUS reagent kit (Affymetrix, Santa Clara,  
516 CA, USA) according to the manufacturer's specifications. Data preprocessing (RMA)

517 was performed using the Bioconductor xps package. All microarray raw data are  
518 available at Gene Expression Omnibus database (GEO,  
519 <http://www.ncbi.nlm.nih.gov/geo/>) under series accession numbers GSE80008,  
520 GSE82160, GSE85487.

521

#### 522 *Enrichment analysis*

523 The Ingenuity Pathway Analysis (IPA) program was used to perform the initial  
524 pathway/function level analysis on genes determined to be differentially expressed in  
525 the microarray analysis (Ingenuity Systems, Red Wood City, CA). Uncorrected p-  
526 values and absolute fold-changes were used with cut-offs of  $p < 0.05$ . Based on a  
527 scientific literature database, the genes were sorted into gene networks and canonical  
528 pathways, and significantly overrepresented pathways were identified. Further  
529 enrichment analysis was performed, including Gene Ontology (GO) term enrichment  
530 using the WEB-based GEne SeT AnaLysis Toolkit (WebGestalt), KEGG pathway  
531 enrichment using the pathway database from the Kyoto Encyclopedia of Genes and  
532 Genomes and transcription factor target enrichment using data from the Broad  
533 Institute Molecular Signatures Database (MSigDB). Genesets from the GO, KEGG  
534 pathways, WikiPathways and Pathway Commons databases, as well as transcription  
535 factors, were considered overrepresented if their corrected p-value was smaller than  
536 0.05. Principal component analysis, correlation matrices (Spearman), unsupervised  
537 hierarchical (Euclidian distance) clustering were performed using XLSTAT and  
538 visualized using MORPHEUS (<https://software.broadinstitute.org/morpheus/>).

539

#### 540 *Data processing and statistical analyses*

541 Data derived from *in vitro* experiments was processed using Graphpad Prism 6 and  
542 analysed using unpaired Student's T test unless stated otherwise. Statistical  
543 significance is expressed as follows: \* P-value<0.05, \*\* p-value<0.01, \*\*\* p-  
544 value<0.001 and \*\*\*\* p-value<0.0001. In all cases, data shown are representative  
545 from at least two independent experiments. Data from experiments performed in  
546 triplicate are expressed as mean  $\pm$  SEM.

547

#### 548 **Acknowledgements**

549 DSM received support from CAPES Computational Biology (23038.010048/2013-  
550 27), CNPq Universal (473897/2013-0) and the Academy of Medical Sciences/UK  
551 (NAF004/1005). PFS and MD received CAPES and CNPq student fellowships  
552 respectively. AB received financial support from NIH-GRIP (TW008276), HHMI-  
553 ECS (55007412). AB is CNPq-PQ scholar and CAPES/ESE. BJF received support  
554 from an Isaac Newton Trust/Wellcome Trust ISSF/University of Cambridge research  
555 grant and a Wellcome Trust Seed Award (201946/Z/16/Z). TD received grant support  
556 from VLAIO (IWT141614). JWV received grant support from CAPES (PVE) and  
557 FWO (G0D6817N).

558 We would like to thank Prof. Aristobolo Mendes Silva from UFMG for providing  
559 reagents, suggestions and Dr. Alan Sher for critical reading and evaluation of these  
560 results.

561 The authors declare no conflict of interest.

562

#### 563 **Author contributions**



564 PFS, JWV and RG designed, performed experiments, analysed the data and wrote the  
565 manuscript; MD, DOP, TD and SMM performed experiments and analysed the data,  
566 BF, AB and DSM designed experiments analysed the data and wrote the manuscript.

567

## 568 **References**

- 569 Berry, M.P., C.M. Graham, F.W. McNab, Z. Xu, S.A. Bloch, T. Oni, K.A. Wilkinson, R.  
570 Banchereau, J. Skinner, R.J. Wilkinson, C. Quinn, D. Blankenship, R.  
571 Dhawan, J.J. Cush, A. Mejias, O. Ramilo, O.M. Kon, V. Pascual, J. Banchereau,  
572 D. Chaussabel, and A. O'Garra. 2010. An interferon-inducible neutrophil-  
573 driven blood transcriptional signature in human tuberculosis. *Nature*  
574 466:973-977.
- 575 Billiau, A. 2006. Anti-inflammatory properties of Type I interferons. *Antiviral Res*  
576 71:108-116.
- 577 Bogunovic, D., S. Boisson-Dupuis, and J.L. Casanova. 2013. ISG15: leading a  
578 double life as a secreted molecule. *Exp Mol Med* 45:e18.
- 579 Bogunovic, D., M. Byun, L.A. Durfee, A. Abhyankar, O. Sanal, D. Mansouri, S. Salem,  
580 I. Radovanovic, A.V. Grant, P. Adimi, N. Mansouri, S. Okada, V.L. Bryant,  
581 X.F. Kong, A. Kreins, M.M. Velez, B. Boisson, S. Khalilzadeh, U. Ozcelik, I.A.  
582 Darazam, J.W. Schoggins, C.M. Rice, S. Al-Muhsen, M. Behr, G. Vogt, A. Puel,  
583 J. Bustamante, P. Gros, J.M. Huibregtse, L. Abel, S. Boisson-Dupuis, and J.L.  
584 Casanova. 2012. Mycobacterial disease and impaired IFN-gamma  
585 immunity in humans with inherited ISG15 deficiency. *Science* 337:1684-  
586 1688.
- 587 Borden, E.C., G.C. Sen, G. Uze, R.H. Silverman, R.M. Ransohoff, G.R. Foster, and G.R.  
588 Stark. 2007. Interferons at age 50: past, current and future impact on  
589 biomedicine. *Nat Rev Drug Discov* 6:975-990.
- 590 Chan, S.H., M. Kobayashi, D. Santoli, B. Perussia, and G. Trinchieri. 1992.  
591 Mechanisms of IFN-gamma induction by natural killer cell stimulatory  
592 factor (NKSF/IL-12). Role of transcription and mRNA stability in the  
593 synergistic interaction between NKSF and IL-2. *J Immunol* 148:92-98.
- 594 Chan, S.H., B. Perussia, J.W. Gupta, M. Kobayashi, M. Pospisil, H.A. Young, S.F.  
595 Wolf, D. Young, S.C. Clark, and G. Trinchieri. 1991. Induction of interferon  
596 gamma production by natural killer cell stimulatory factor:  
597 characterization of the responder cells and synergy with other inducers. *J*  
598 *Exp Med* 173:869-879.
- 599 Chomarat, P., M.C. Rissoan, J. Banchereau, and P. Miossec. 1993. Interferon  
600 gamma inhibits interleukin 10 production by monocytes. *J Exp Med*  
601 177:523-527.
- 602 D'Cunha, J., E. Knight, Jr., A.L. Haas, R.L. Truitt, and E.C. Borden. 1996.  
603 Immunoregulatory properties of ISG15, an interferon-induced cytokine.  
604 *Proc Natl Acad Sci U S A* 93:211-215.
- 605 de Veer, M.J., M. Holko, M. Frevel, E. Walker, S. Der, J.M. Paranjape, R.H.  
606 Silverman, and B.R. Williams. 2001. Functional classification of interferon-  
607 stimulated genes identified using microarrays. *J Leukoc Biol* 69:912-920.

- 608 Der, S.D., A. Zhou, B.R. Williams, and R.H. Silverman. 1998. Identification of genes  
609 differentially regulated by interferon alpha, beta, or gamma using  
610 oligonucleotide arrays. *Proc Natl Acad Sci U S A* 95:15623-15628.
- 611 Dos Santos, P.F., and D.S. Mansur. 2017. Beyond ISGylation: Functions of Free  
612 Intracellular and Extracellular ISG15. *J Interferon Cytokine Res*
- 613 Haas, A.L., P. Ahrens, P.M. Bright, and H. Ankel. 1987. Interferon induces a 15-  
614 kilodalton protein exhibiting marked homology to ubiquitin. *J Biol Chem*  
615 262:11315-11323.
- 616 Hansen, T.R., and J.K. Pru. 2014. ISGylation: a conserved pathway in mammalian  
617 pregnancy. *Adv Exp Med Biol* 759:13-31.
- 618 Hare, N.J., B. Chan, E. Chan, K.L. Kaufman, W.J. Britton, and B.M. Saunders. 2015.  
619 Microparticles released from Mycobacterium tuberculosis-infected  
620 human macrophages contain increased levels of the type I interferon  
621 inducible proteins including ISG15. *Proteomics* 15:3020-3029.
- 622 Henkes, L.E., J.K. Pru, R.L. Ashley, R.V. Anthony, D.N. Veeramachaneni, K.C. Gates,  
623 and T.R. Hansen. 2015. Embryo mortality in Isg15<sup>-/-</sup> mice is exacerbated  
624 by environmental stress. *Biol Reprod* 92:36.
- 625 Hermann, M., and D. Bogunovic. 2017. ISG15: In Sickness and in Health. *Trends*  
626 *Immunol* 38:79-93.
- 627 Knight, E., Jr., D. Fahey, B. Cordova, M. Hillman, R. Kutny, N. Reich, and D.  
628 Blomstrom. 1988. A 15-kDa interferon-induced protein is derived by  
629 COOH-terminal processing of a 17-kDa precursor. *J Biol Chem* 263:4520-  
630 4522.
- 631 Loeb, K.R., and A.L. Haas. 1992. The interferon-inducible 15-kDa ubiquitin  
632 homolog conjugates to intracellular proteins. *J Biol Chem* 267:7806-7813.
- 633 Ma, W., W. Lim, K. Gee, S. Aucoin, D. Nandan, M. Kozlowski, F. Diaz-Mitoma, and A.  
634 Kumar. 2001. The p38 mitogen-activated kinase pathway regulates the  
635 human interleukin-10 promoter via the activation of Sp1 transcription  
636 factor in lipopolysaccharide-stimulated human macrophages. *J Biol Chem*  
637 276:13664-13674.
- 638 McNab, F., K. Mayer-Barber, A. Sher, A. Wack, and A. O'Garra. 2015. Type I  
639 interferons in infectious disease. *Nat Rev Immunol* 15:87-103.
- 640 Morales, D.J., and D.J. Lenschow. 2013. The antiviral activities of ISG15. *J Mol Biol*  
641 425:4995-5008.
- 642 Nair, S., P.A. Ramaswamy, S. Ghosh, D.C. Joshi, N. Pathak, I. Siddiqui, P. Sharma,  
643 S.E. Hasnain, S.C. Mande, and S. Mukhopadhyay. 2009. The PPE18 of  
644 Mycobacterium tuberculosis interacts with TLR2 and activates IL-10  
645 induction in macrophage. *J Immunol* 183:6269-6281.
- 646 Narasimhan, J., J.L. Potter, and A.L. Haas. 1996. Conjugation of the 15-kDa  
647 interferon-induced ubiquitin homolog is distinct from that of ubiquitin. *J*  
648 *Biol Chem* 271:324-330.
- 649 Novais, F.O., L.P. Carvalho, S. Passos, D.S. Roos, E.M. Carvalho, P. Scott, and D.P.  
650 Beiting. 2015. Genomic profiling of human Leishmania braziliensis lesions  
651 identifies transcriptional modules associated with cutaneous  
652 immunopathology. *J Invest Dermatol* 135:94-101.
- 653 Owhashi, M., Y. Taoka, K. Ishii, S. Nakazawa, H. Uemura, and H. Kambara. 2003.  
654 Identification of a ubiquitin family protein as a novel neutrophil  
655 chemotactic factor. *Biochem Biophys Res Commun* 309:533-539.

- 656 Potter, J.L., J. Narasimhan, L. Mende-Mueller, and A.L. Haas. 1999. Precursor  
657 processing of pro-ISG15/UCRP, an interferon-beta-induced ubiquitin-like  
658 protein. *J Biol Chem* 274:25061-25068.
- 659 Recht, M., E.C. Borden, and E. Knight, Jr. 1991. A human 15-kDa IFN-induced  
660 protein induces the secretion of IFN-gamma. *J Immunol* 147:2617-2623.
- 661 Redford, P.S., P.J. Murray, and A. O'Garra. 2011. The role of IL-10 in immune  
662 regulation during M. tuberculosis infection. *Mucosal Immunol* 4:261-270.
- 663 Rider, P., E. Voronov, C.A. Dinarello, R.N. Apte, and I. Cohen. 2017. Alarmins: Feel  
664 the Stress. *J Immunol* 198:1395-1402.
- 665 Schoggins, J.W., and C.M. Rice. 2011. Interferon-stimulated genes and their  
666 antiviral effector functions. *Curr Opin Virol* 1:519-525.
- 667 Skaug, B., and Z.J. Chen. 2010. Emerging role of ISG15 in antiviral immunity. *Cell*  
668 143:187-190.
- 669 Skrzeczynska-Moncznik, J., M. Bzowska, S. Loseke, E. Grage-Griebenow, M.  
670 Zembala, and J. Pryjma. 2008. Peripheral blood CD14<sup>high</sup> CD16<sup>+</sup>  
671 monocytes are main producers of IL-10. *Scand J Immunol* 67:152-159.
- 672 Speake, C., S. Presnell, K. Domico, B. Zeitner, A. Bjork, D. Anderson, M.J. Mason, E.  
673 Whalen, O. Vargas, D. Popov, D. Rinchai, N. Jourde-Chiche, L. Chiche, C.  
674 Quinn, and D. Chaussabel. 2015. An interactive web application for the  
675 dissemination of human systems immunology data. *J Transl Med* 13:196.
- 676 Speer, S.D., Z. Li, S. Buta, B. Payelle-Brogard, L. Qian, F. Vigant, E. Rubino, T.J.  
677 Gardner, T. Wedeking, M. Hermann, J. Duehr, O. Sanal, I. Tezcan, N.  
678 Mansouri, P. Tabarsi, D. Mansouri, V. Francois-Newton, C.F. Daussy, M.R.  
679 Rodriguez, D.J. Lenschow, A.N. Freiberg, D. Tortorella, J. Piehler, B. Lee, A.  
680 Garcia-Sastre, S. Pellegrini, and D. Bogunovic. 2016. ISG15 deficiency and  
681 increased viral resistance in humans but not mice. *Nat Commun* 7:11496.
- 682 Tamassia, N., M. Zimmermann, M. Castellucci, R. Ostuni, K. Bruderek, B. Schilling,  
683 S. Brandau, F. Bazzoni, G. Natoli, and M.A. Cassatella. 2013. Cutting edge:  
684 An inactive chromatin configuration at the IL-10 locus in human  
685 neutrophils. *J Immunol* 190:1921-1925.
- 686 Tecalco Cruz, A.C., and K. Mejia-Barreto. 2017. Cell type-dependent regulation of  
687 free ISG15 levels and ISGylation. *J Cell Commun Signal*
- 688 Teles, R.M., T.G. Graeber, S.R. Krutzik, D. Montoya, M. Schenk, D.J. Lee, E.  
689 Komisopoulou, K. Kelly-Scumpia, R. Chun, S.S. Iyer, E.N. Sarno, T.H. Rea, M.  
690 Hewison, J.S. Adams, S.J. Popper, D.A. Relman, S. Stenger, B.R. Bloom, G.  
691 Cheng, and R.L. Modlin. 2013. Type I interferon suppresses type II  
692 interferon-triggered human anti-mycobacterial responses. *Science*  
693 339:1448-1453.
- 694 Wang, B.X., S.A. Grover, P. Kannu, G. Yoon, R.M. Laxer, E.A. Yeh, and E.N. Fish.  
695 2017a. Interferon-Stimulated Gene Expression as a Preferred Biomarker  
696 for Disease Activity in Aicardi-Goutieres Syndrome. *J Interferon Cytokine*  
697 *Res* 37:147-152.
- 698 Wang, P., H. Qi, S. Song, S. Li, N. Huang, W. Han, and D. Ma. 2015a. ImmuCo: a  
699 database of gene co-expression in immune cells. *Nucleic Acids Res*  
700 43:D1133-1139.
- 701 Wang, P., Y. Yang, W. Han, and D. Ma. 2015b. ImmuSort, a database on gene  
702 plasticity and electronic sorting for immune cells. *Sci Rep* 5:10370.
- 703 Wang, W., Y. Yin, L. Xu, J. Su, F. Huang, Y. Wang, P.P.C. Boor, K. Chen, W. Wang, W.  
704 Cao, X. Zhou, P. Liu, L.J.W. van der Laan, J. Kwekkeboom, M.P.

705 Peppelenbosch, and Q. Pan. 2017b. Unphosphorylated ISGF3 drives  
706 constitutive expression of interferon-stimulated genes to protect against  
707 viral infections. *Sci Signal* 10:  
708 Zhang, X., D. Bogunovic, B. Payelle-Brogard, V. Francois-Newton, S.D. Speer, C.  
709 Yuan, S. Volpi, Z. Li, O. Sanal, D. Mansouri, I. Tezcan, G.I. Rice, C. Chen, N.  
710 Mansouri, S.A. Mahdavian, Y. Itan, B. Boisson, S. Okada, L. Zeng, X. Wang,  
711 H. Jiang, W. Liu, T. Han, D. Liu, T. Ma, B. Wang, M. Liu, J.Y. Liu, Q.K. Wang, D.  
712 Yalnizoglu, L. Radoshevich, G. Uze, P. Gros, F. Rozenberg, S.Y. Zhang, E.  
713 Jouanguy, J. Bustamante, A. Garcia-Sastre, L. Abel, P. Lebon, L.D.  
714 Notarangelo, Y.J. Crow, S. Boisson-Dupuis, J.L. Casanova, and S. Pellegrini.  
715 2015. Human intracellular ISG15 prevents interferon-alpha/beta over-  
716 amplification and auto-inflammation. *Nature* 517:89-93.  
717  
718  
719

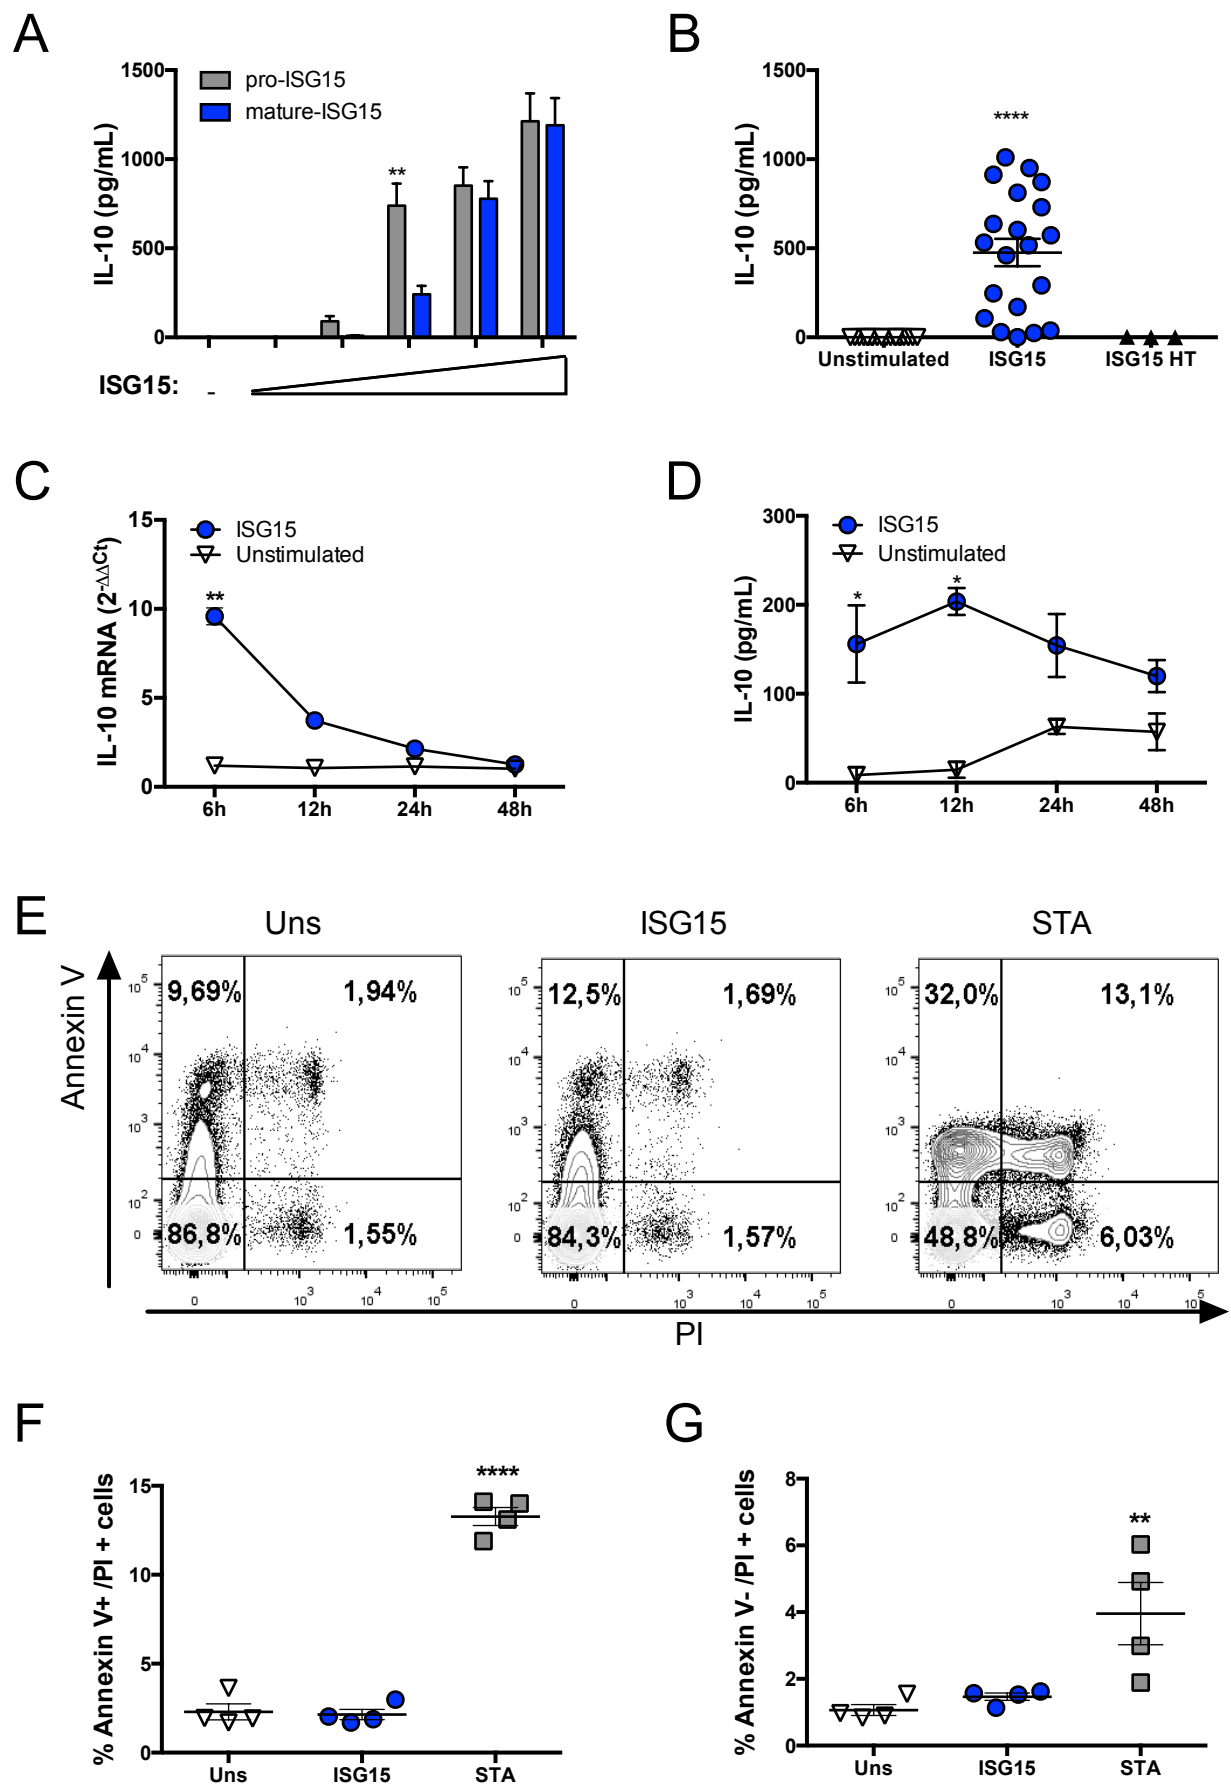

A

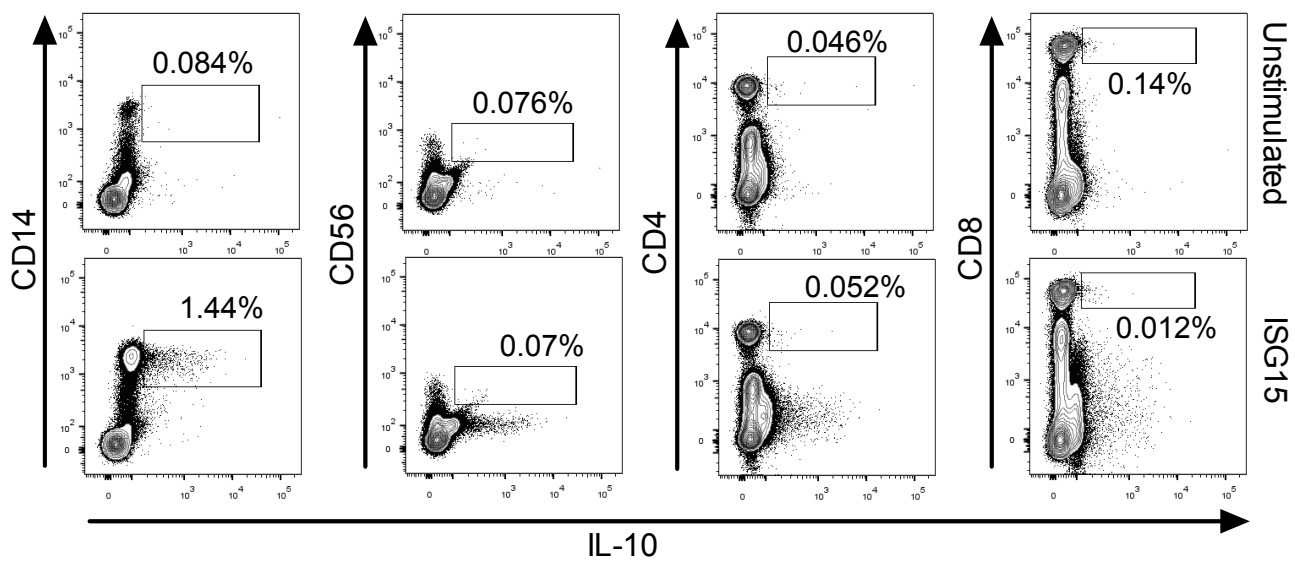

B

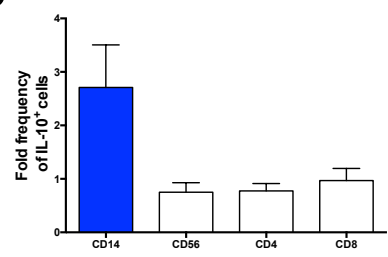

C

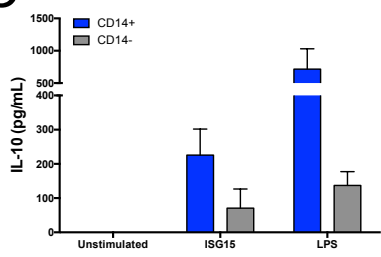

D

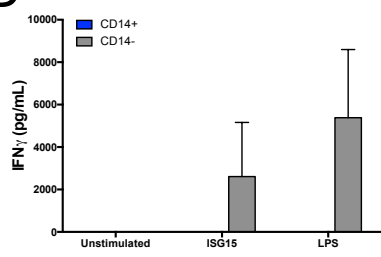

E

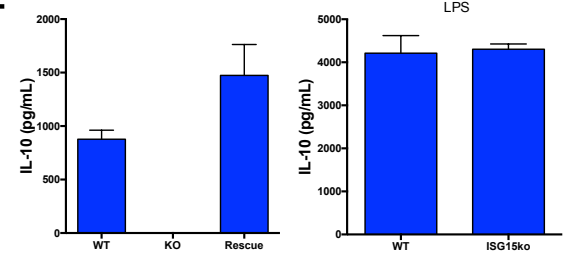

F

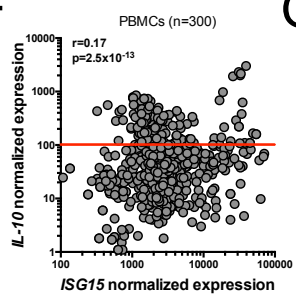

G

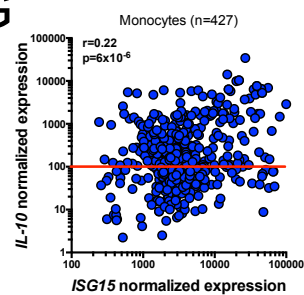

H

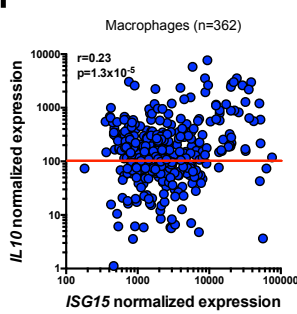

I

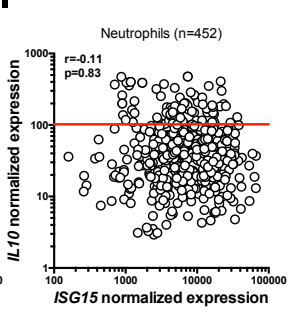

J

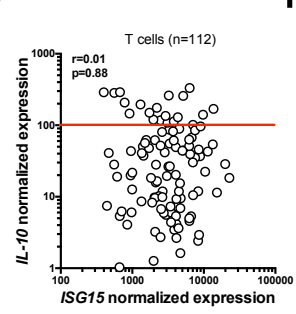

K

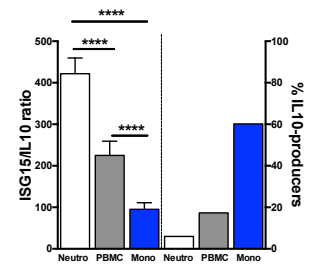

A

| Gene symbol | p value | logFC LAT | logFC ACT | p value            |
|-------------|---------|-----------|-----------|--------------------|
| ISG15       | 0.0142  | -1.00     | 1.99      | 7x10 <sup>-6</sup> |
| IL10        | 0.0040  | -0.62     | 0.34      | 0.0324             |
| IFNG        | 0.0931  | 0.45      | -0.52     | 0.0556             |
| CD14        | 0.0857  | -0.23     | 0.81      | 1x10 <sup>-5</sup> |
| CD4         | 0.0012  | -0.57     | 0.06      | 0.7990             |
| CD8A        | 0.0004  | 0.86      | -1.32     | 0.0008             |
| NCAM1       | 0.0370  | 1.18      | -0.47     | 0.0382             |
| MAPK1       | 0.1480  | 0.25      | 0.37      | 0.0029             |
| MAPK14      | 0.0019  | 0.86      | 1.02      | 0.0004             |
| MAPK3       | 0.0001  | -0.52     | 0.72      | 0.0002             |
| PIK3CA      | 0.0228  | -4.45     | 3.79      | 0.0872             |
| STAT1       | 0.2800  | -0.19     | 1.41      | 6x10 <sup>-9</sup> |
| STAT2       | 0.0940  | -0.27     | 1.07      | 3x10 <sup>-8</sup> |
| STAT3       | 0.0025  | -0.35     | 0.60      | 0.0001             |
| STAT4       | 0.5900  | 0.06      | -0.64     | 0.0003             |

B

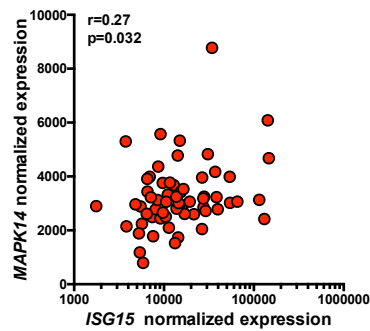

C

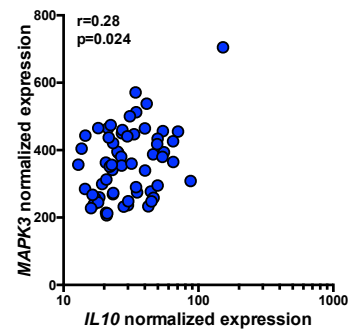

D

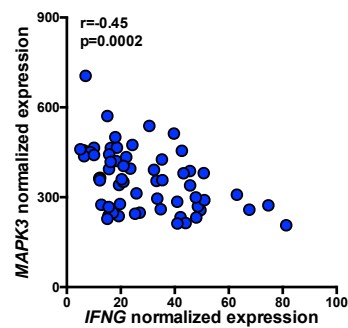

E

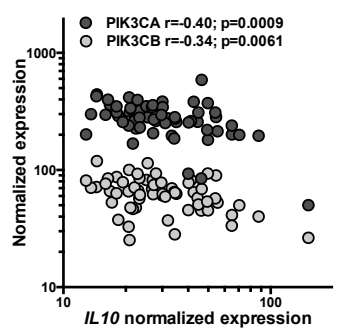

F

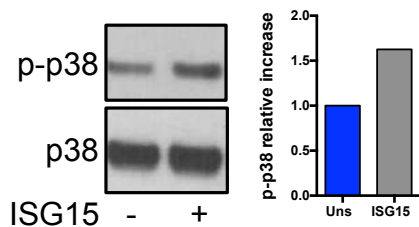

G

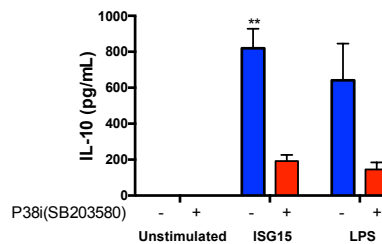

H

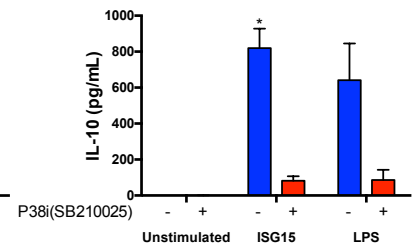

I

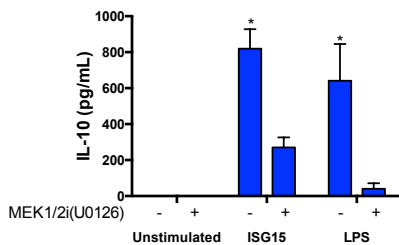

J

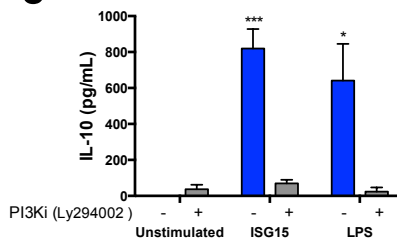

K

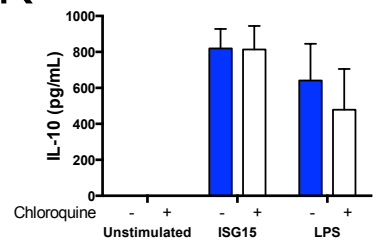

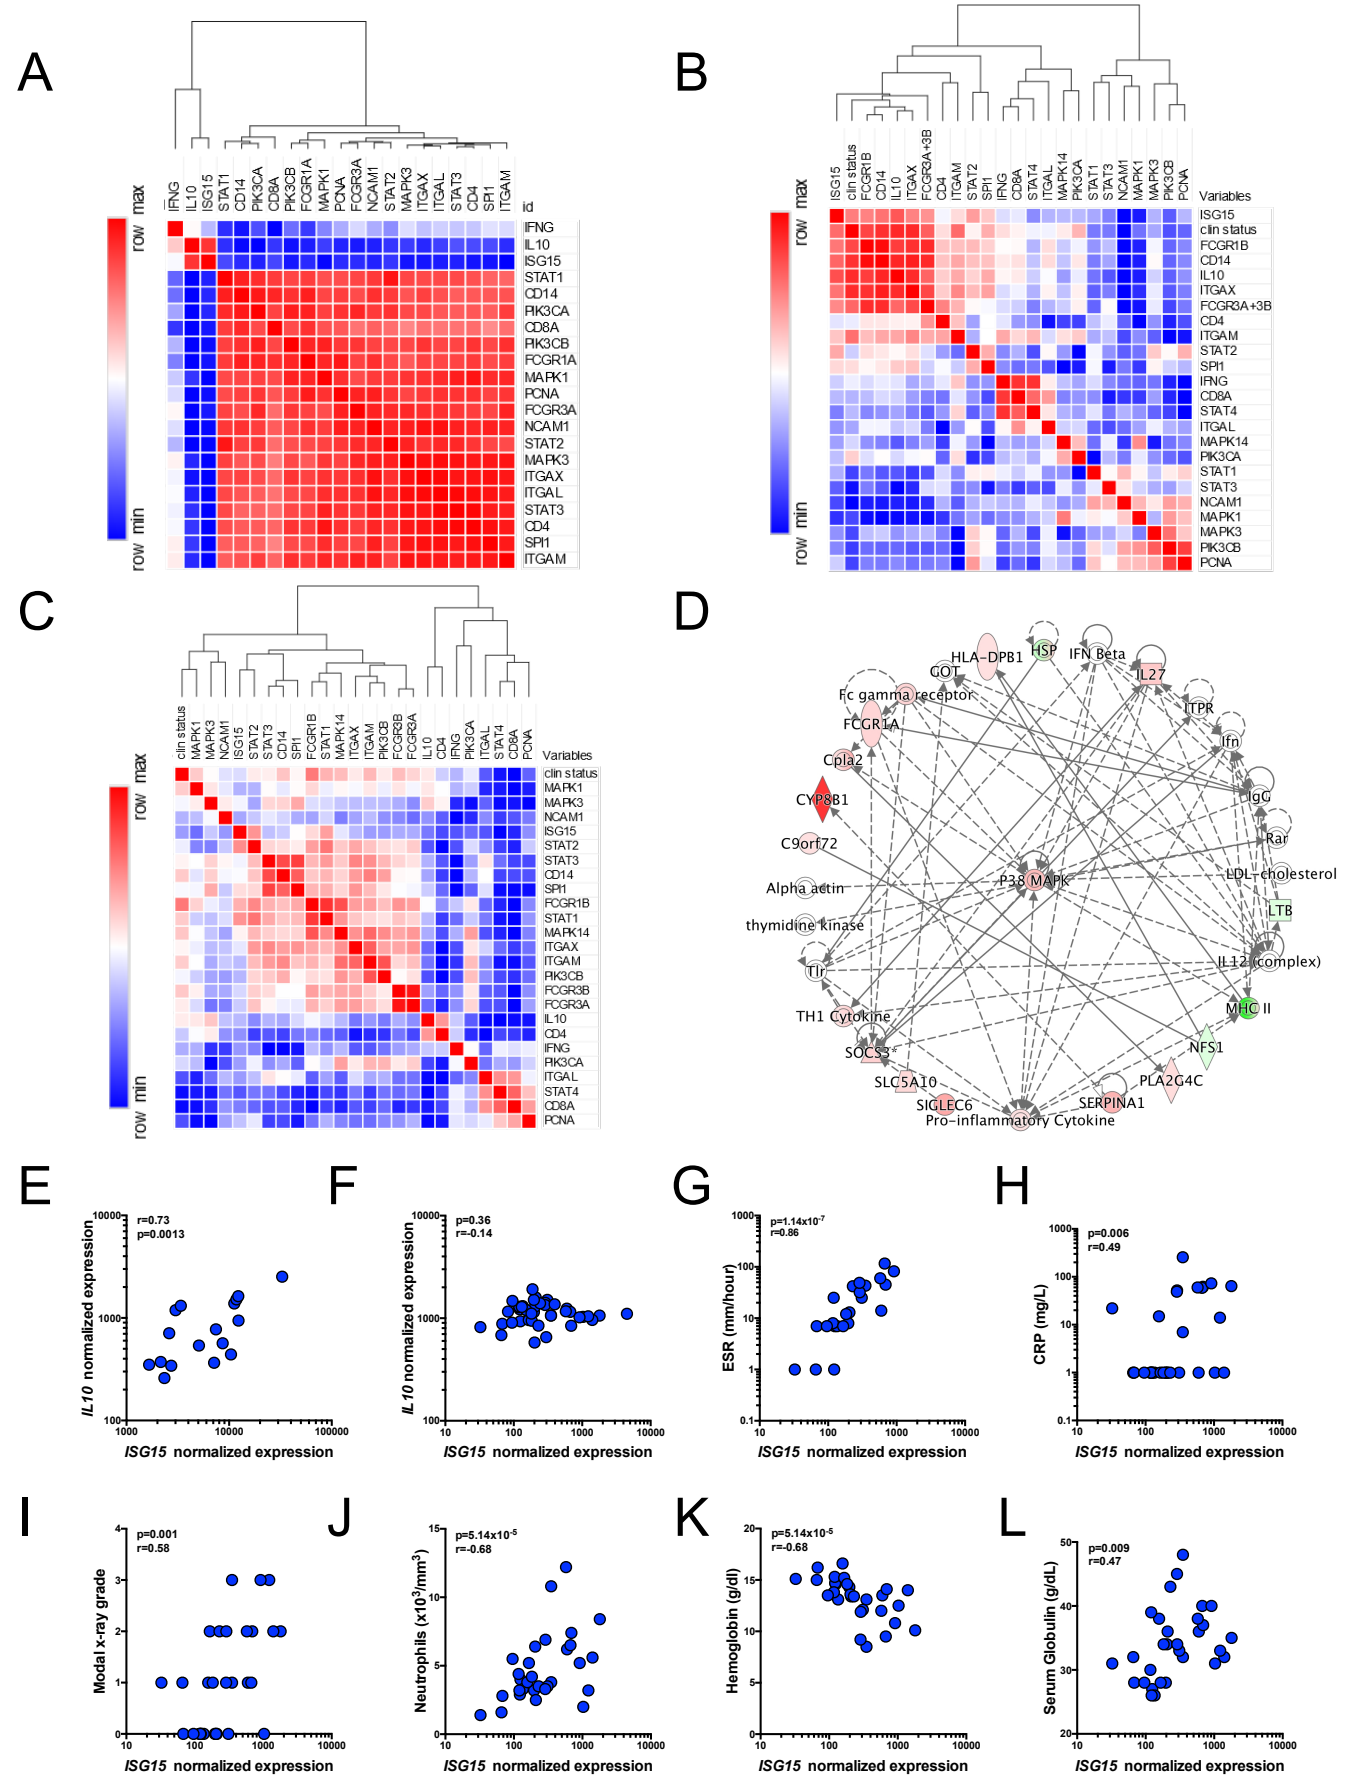

Source: https://www.biorxiv.org/content/10.1101/166553v2.full.pdf
